# Supplementary material for: Real-Life Experience and Diagnostic Utility of the BioFire Joint Infection PCR Panel in Bone and Joint Infections: Analysis of a Prospective Validation Study
Source: PubMed Central journal article supplement — Infect Dis Ther. 2023 May 2;12(5):1437–43. doi: 10.1007/s40121-023-00809-x (PMC10229488; doi:10.1007/s40121-023-00809-x), 2023-05-02
Supplement: 40121_2023_809_MOESM1_ESM.pdf [file 40121_2023_809_MOESM1_ESM.pdf]

**Real-life Experience and Diagnostic Utility of the BioFire Joint Infection PCR Panel in Bone and Joint Infections: Analysis of a Prospective Validation Study**

**Authors:** Tomer Hoffman<sup>1</sup>, Or Kriger<sup>2</sup>, Shoshana Cohen<sup>2</sup>, Shiraz Gefen-Halevi<sup>2</sup>, Dafna Yahav<sup>1</sup>, Sharon Amit<sup>2</sup>

**Affiliations:**

1. Infectious diseases unit, Sheba Medical Center, Ramat Gan, Israel
2. Clinical Microbiology, Sheba Medical Center, Ramat Gan, Israel

**Corresponding author :**

Tomer Hoffman

Sheba Medical Center, Tel Hashomer, 2 Derech Sheba St., 5266202 Ramat Gan, Israel

E-mail : tomerhof@gmail.com

Tel : +972-523514665

Fax : +972-3-5303501

ORCID : 0000-0003-3535-6835

**Table S1. Patient characteristics**

|                                                 | <b>Total (n=57)</b> | <b>Infected (n=39)</b> | <b>Uninfected (n=18)</b> | <b>P value</b> |
|-------------------------------------------------|---------------------|------------------------|--------------------------|----------------|
| <b>Gender, male (%)</b>                         | 35 (61.4)           | 21 (53.8)              | 14 (77.8)                | 0.142          |
| <b>Age, years (mean)</b>                        | 64.5                | 65.9                   | 61.6                     | 0.473          |
| <b>Diabetes (%)</b>                             | 17 (29.8)           | 13 (33.3)              | 4 (22.2)                 | 0.537          |
| <b>Cardio- or cerebro-vascular disease (%)</b>  | 20 (35)             | 14 (35.9)              | 6 (33.3)                 | 1              |
| <b>Chronic kidney disease (%)</b>               | 8 (14)              | 6 (15.4)               | 2 (11.1)                 | 1              |
| <b>Inflammatory arthritis (%)</b>               | 1 (1.8)             | 1 (2.6)                | 0 (0)                    | -              |
| <b>Cancer (%)</b>                               | 5 (8.8)             | 4 (10.3)               | 1 (5.6)                  | 1              |
| <b>Immunocompromised (%)</b>                    | 3 (5.3)             | 2 (5.1)                | 1 (5.6)                  | 1              |
| <b>Sample type (%)</b>                          |                     |                        |                          | <b>0.02</b>    |
| <b>Tissue sample</b>                            | 23 (40.4)           | 20 (51.3)              | 3 (16.7)                 |                |
| <b>Fluid sample</b>                             | 34 (59.6)           | 19 (48.7)              | 15 (83.3)                |                |
| <b>Sample obtainment method (%)</b>             |                     |                        |                          | <b>0.012</b>   |
| <b>Arthrocentesis</b>                           | 30 (52.6)           | 16 (41)                | 14 (77.8)                |                |
| <b>Intra-operative</b>                          | 27 (47.4)           | 23 (59)                | 4 (22.2)                 |                |
| <b>Suspected infection site<sup>1</sup> (%)</b> |                     |                        |                          |                |
| <b>Bone</b>                                     | 13 (22.8)           | 11 (28.2)              | 2 (11.1)                 | 0.124          |
| <b>Joint</b>                                    | 44 (77.2)           | 28 (71.8)              | 16 (88.8)                | 0.191          |
| <b>Native</b>                                   | 22 (38.6)           | 14 (35.9)              | 8 (44.4)                 | 1              |
| <b>Prosthetic</b>                               | 22 (38.6)           | 14 (35.9)              | 8 (44.4)                 |                |
| <b>Soft tissue</b>                              | 2 (3.5)             | 2 (5.1)                | 0 (0)                    | 1              |

|                                                                |           |           |           |                  |
|----------------------------------------------------------------|-----------|-----------|-----------|------------------|
| <b>Suspected post-operative infection (%)</b>                  | 33 (57.9) | 24 (61.5) | 9 (50)    | 0.565            |
| <b>Multiple prior revision surgeries (%)</b>                   | 8 (24.2)  | 6 (25)    | 2 (22.2)  | 1                |
| <b>Antibiotics in preceding 14 days (%)</b>                    | 20 (35.1) | 14 (35.9) | 6 (33.3)  | 1                |
| <b>Blood leukocyte count, 10<sup>9</sup>/L (mean)</b>          | 10.2      | 10.9      | 8.5       | 0.141            |
| <b>Blood C-reactive protein, mg/L (mean)</b>                   | 138       | 162       | 74        | <b>0.007</b>     |
| <b>Arthrocentesis performed (%)</b>                            | 34 (59.6) | 20 (51.3) | 14 (77.8) | 0.083            |
| <b>Synovial fluid leukocyte count, 10<sup>9</sup>/L (mean)</b> | 54.9      | 78        | 24.1      | <b>0.003</b>     |
| <b>Synovial fluid neutrophil, percentage (mean)</b>            | 78.8      | 84.6      | 71.5      | 0.172            |
| <b>Surgery performed (%)</b>                                   | 40 (70.1) | 35 (89.7) | 5 (27.7)  | <b>&lt;0.001</b> |
| <b>No infection found</b>                                      | 1 (1.7)   | 0 (0)     | 1 (5.5)   |                  |
| <b>Debridement</b>                                             | 32 (56.2) | 29 (74.3) | 3 (16.7)  |                  |
| <b>One-stage joint exchange</b>                                | 1 (1.7)   | 1 (2.6)   | 0 (0)     |                  |
| <b>Two-stage joint exchange</b>                                | 5 (8.8)   | 5 (12.8)  | 0 (0)     |                  |
| <b>Intramedullary nail exchange</b>                            | 1 (1.7)   | 0 (0)     | 1 (5.5)   |                  |
| <b>Empirical antibiotics administered (%)</b>                  | 45 (78.9) | 37 (94.9) | 8 (44.4)  | <b>&lt;0.001</b> |
| <b>Final diagnosis<sup>1</sup></b>                             |           |           |           | n/a              |
| <b>Native joint septic</b>                                     | 14        | 14        | 0         |                  |

|                                                  |           |           |                      |                  |
|--------------------------------------------------|-----------|-----------|----------------------|------------------|
| <b>arthritis</b>                                 |           |           |                      |                  |
| <b>Prosthetic joint infection</b>                | 14        | 14        | 0                    |                  |
| <b>Spinal infection</b>                          | 8         | 8         | 0                    |                  |
| <b>Osteomyelitis</b>                             | 1         | 1         | 0                    |                  |
| <b>Device-associated osteomyelitis</b>           | 2         | 2         | 0                    |                  |
| <b>Soft tissue infection</b>                     | 9         | 9         | 0                    |                  |
| <b>Uninfected</b>                                | 18        | 0         | 18                   |                  |
| <b>Hospital length of stay, days (mean)</b>      | 15        | 20        | 5                    | <b>&lt;0.001</b> |
| <b>Re-operation performed (%)</b>                | 7 (12.3)  | 7 (17.9)  | 0 (0)                | 0.565            |
| <b>Length of follow-up, days (mean)</b>          | 44        | 52        | 27                   | <b>0.015</b>     |
| <b>Outcome at last follow-up (%)</b>             |           |           |                      | 0.180            |
| <b>No evidence of infection</b>                  | 46 (80.7) | 29 (74.3) | 17 (94.4)            |                  |
| <b>Persistent or recurrent infection</b>         | 7 (12.3)  | 6 (15.4)  | 1 (5.6) <sup>2</sup> |                  |
| <b>Death</b>                                     | 4 (7)     | 4 (10.3)  | 0 (0)                |                  |
| <b>Ongoing antibiotics at last follow-up (%)</b> | 17 (29.8) | 16 (41)   | 1 (5.6)              | <b>0.011</b>     |

<sup>1</sup> More than one suspected infected site or diagnosis may apply to each patient

<sup>2</sup> A single patient who was uninfected at index event later developed persistent septic arthritis

**Table S2. Pathogens identified in infected cases**

|                                     |   |
|-------------------------------------|---|
| <i>Staphylococcus aureus</i>        | 6 |
| <i>Cutibacterium acnes</i>          | 3 |
| <i>Staphylococcus epidermidis</i>   | 2 |
| <i>Streptococcus pyogenes</i>       | 2 |
| <i>Streptococcus agalactiae</i>     | 2 |
| <i>Streptococcus dysgalactiae</i>   | 2 |
| <i>Escherichia coli</i>             | 2 |
| <i>Enterobacter cloacae complex</i> | 2 |
| <i>Pseudomonas aeruginosa</i>       | 2 |
| <i>Klebsiella pneumoniae</i>        | 1 |
| <i>Klebsiella aerogenes</i>         | 1 |
| <i>Aggregatibacter aphrophilus</i>  | 1 |
| <i>Staphylococcus hominis</i>       | 1 |
| <i>Streptococcus intermedius</i>    | 1 |
| <i>Streptococcus gallolyticus</i>   | 1 |
| <i>Finegoldia magna</i>             | 1 |
| <i>Bacteroides fragilis</i>         | 1 |
| <i>Anaerococcus spp.</i>            | 1 |
| <i>Ureaplasma urealyticum</i>       | 1 |
| Mixed flora                         | 1 |

**Table S3. Description of BioFire-negative infected cases (n=17)**

| <b>Case</b> | <b>Description</b>                                                          |
|-------------|-----------------------------------------------------------------------------|
| 1           | <i>Staphylococcus epidermidis</i> in culture and 16s rRNA PCR               |
| 2           | <i>Cutibacterium acnes</i> in culture                                       |
| 3           | <i>Staphylococcus epidermidis</i> in culture and 16s rRNA PCR               |
| 4           | <i>Cutibacterium acnes</i> in culture                                       |
| 5           | <i>Staphylococcus aureus</i> <sup>1</sup> in culture                        |
| 6           | <i>Enterobacter cloacae</i> <sup>1</sup> in culture and 16s rRNA PCR        |
| 7           | <i>Cutibacterium acnes</i> in culture                                       |
| 8           | <i>Aggregatibacter aphrophilus</i> in blood culture and tissue 16s rRNA PCR |
| 9           | <i>Ureaplasma urealyticum</i> in 16s rRNA PCR                               |
| 10          | <i>Staphylococcus hominis</i> in 16s rRNA PCR                               |
| 11          | BioFire, culture and 16s rRNA PCR were negative                             |
| 12          | BioFire, culture and 16s rRNA PCR were negative                             |
| 13          | BioFire, culture and 16s rRNA PCR were negative                             |
| 14          | BioFire, culture and 16s rRNA PCR were negative                             |
| 15          | BioFire, culture and 16s rRNA PCR were negative                             |
| 16          | BioFire, culture and 16s rRNA PCR were negative                             |
| 17          | BioFire, culture and 16s rRNA PCR were negative                             |

<sup>1</sup> Organism is included in the BioFire panel

**Table S4. Description of BioFire – culture discrepant cases (n=12)**

| Case | Infection status | BioFire result | Culture result | Description                                                                                                          |
|------|------------------|----------------|----------------|----------------------------------------------------------------------------------------------------------------------|
| 1    | Infected         | Negative       | Positive       | <i>Staphylococcus epidermidis</i> in culture and 16s rRNA PCR                                                        |
| 2    | Infected         | Negative       | Positive       | <i>Cutibacterium acnes</i> in culture                                                                                |
| 3    | Infected         | Negative       | Positive       | <i>Staphylococcus epidermidis</i> in culture and 16s rRNA PCR                                                        |
| 4    | Infected         | Negative       | Positive       | <i>Cutibacterium acnes</i> in culture                                                                                |
| 5    | Infected         | Negative       | Positive       | <i>Staphylococcus aureus</i> in culture                                                                              |
| 6    | Infected         | Negative       | Positive       | <i>Enterobacter cloacae</i> in culture and 16s rRNA PCR                                                              |
| 7    | Infected         | Negative       | Positive       | <i>Cutibacterium acnes</i> in culture                                                                                |
| 8    | Infected         | Positive       | Negative       | <i>Streptococcus</i> spp. in BioFire, <i>Streptococcus dysgalactiae</i> in 16s rRNA PCR, recent antibiotic treatment |
| 9    | Infected         | Positive       | Negative       | <i>Streptococcus</i> spp. in BioFire, <i>Streptococcus dysgalactiae</i> in 16s rRNA PCR, recent antibiotic treatment |
| 10   | Uninfected       | Negative       | Positive       | <i>Cutibacterium acnes</i> in single specimen culture                                                                |
| 11   | Uninfected       | Negative       | Positive       | <i>Bacillus</i> spp. in single specimen culture                                                                      |
| 12   | Uninfected       | Negative       | Positive       | <i>Cutibacterium acnes</i> in single specimen culture                                                                |

**Table S5. Diagnostic modalities sensitivity rates according to specimen type, obtainment method, infection site and recent antibiotic exposure**

| <b>Modality</b> | <b>Fluid sample</b> | <b>Tissue sample</b> | <b>Arthrocentesis</b> | <b>Intra-operative</b> | <b>Native joint</b> | <b>Prosthetic joint</b> | <b>Bone</b> | <b>Soft tissue</b> | <b>Recent antibiotics</b> | <b>No recent antibiotics</b> |
|-----------------|---------------------|----------------------|-----------------------|------------------------|---------------------|-------------------------|-------------|--------------------|---------------------------|------------------------------|
| BioFire         | 58%                 | 55%                  | 63%                   | 52%                    | 43%                 | 71%                     | 44%         | 100%               | 62%                       | 54%                          |
| Gram stain      | 26%                 | 40%                  | 13%                   | 39%                    | 29%                 | 36%                     | 22%         | 100%               | 31%                       | 35%                          |
| Culture         | 68%                 | 70%                  | 63%                   | 74%                    | 43%                 | 86%                     | 67%         | 100%               | 62%                       | 73%                          |
| 16s rRNA PCR    | 64%                 | 81%                  | 64%                   | 79%                    | 45%                 | 80%                     | 100%        | 100%               | 82%                       | 68%                          |



## Supplementary S6. 16s rRNA procedure

### DNA Extraction

DNA Extraction was performed using Seegene's STARMAG (Seegene Inc., S. Korea) on a robotic Hamilton liquid handler. Homogenized ground solid tissue or synovial fluid were used according to availability in each case.

### Initial PCR

5ul of DNA was used as template for initial PCR.

PCR reaction was as follows:

| Reagent              | ul |
|----------------------|----|
| Roche Sybr ready-mix | 15 |
| 16s F primer 10um    | 1  |
| 16s R primer 10um    | 1  |
| DNA template         | 5  |
| h20                  | 8  |
| total                | 30 |

PCR Thermocycler Program was as follows:

| Temperature | Time |     |
|-------------|------|-----|
| 95          | 5    | min |
| 95          | 15   | sec |
| 58          | 30   | sec |
| 72          | 30   | sec |
| repeat      | x29  |     |
| 72          | 3    | min |

Primers used for 16s (~750bp):

16SAF CCAGACTCCTACGGGAGGCAG

16SAR ACATTTCAACAACACGAGCTGACGA
